# Supplementary material for: Proteome of monocyte priming by lipopolysaccharide, including changes in interleukin-1beta and leukocyte elastase inhibitor
Source: Springer Nature journal article supplement (doi:10.1186/1477-5956-6-13), 2008-01-01
Supplement: Additional file 5 [file 1477-5956-6-13-s5.pdf]

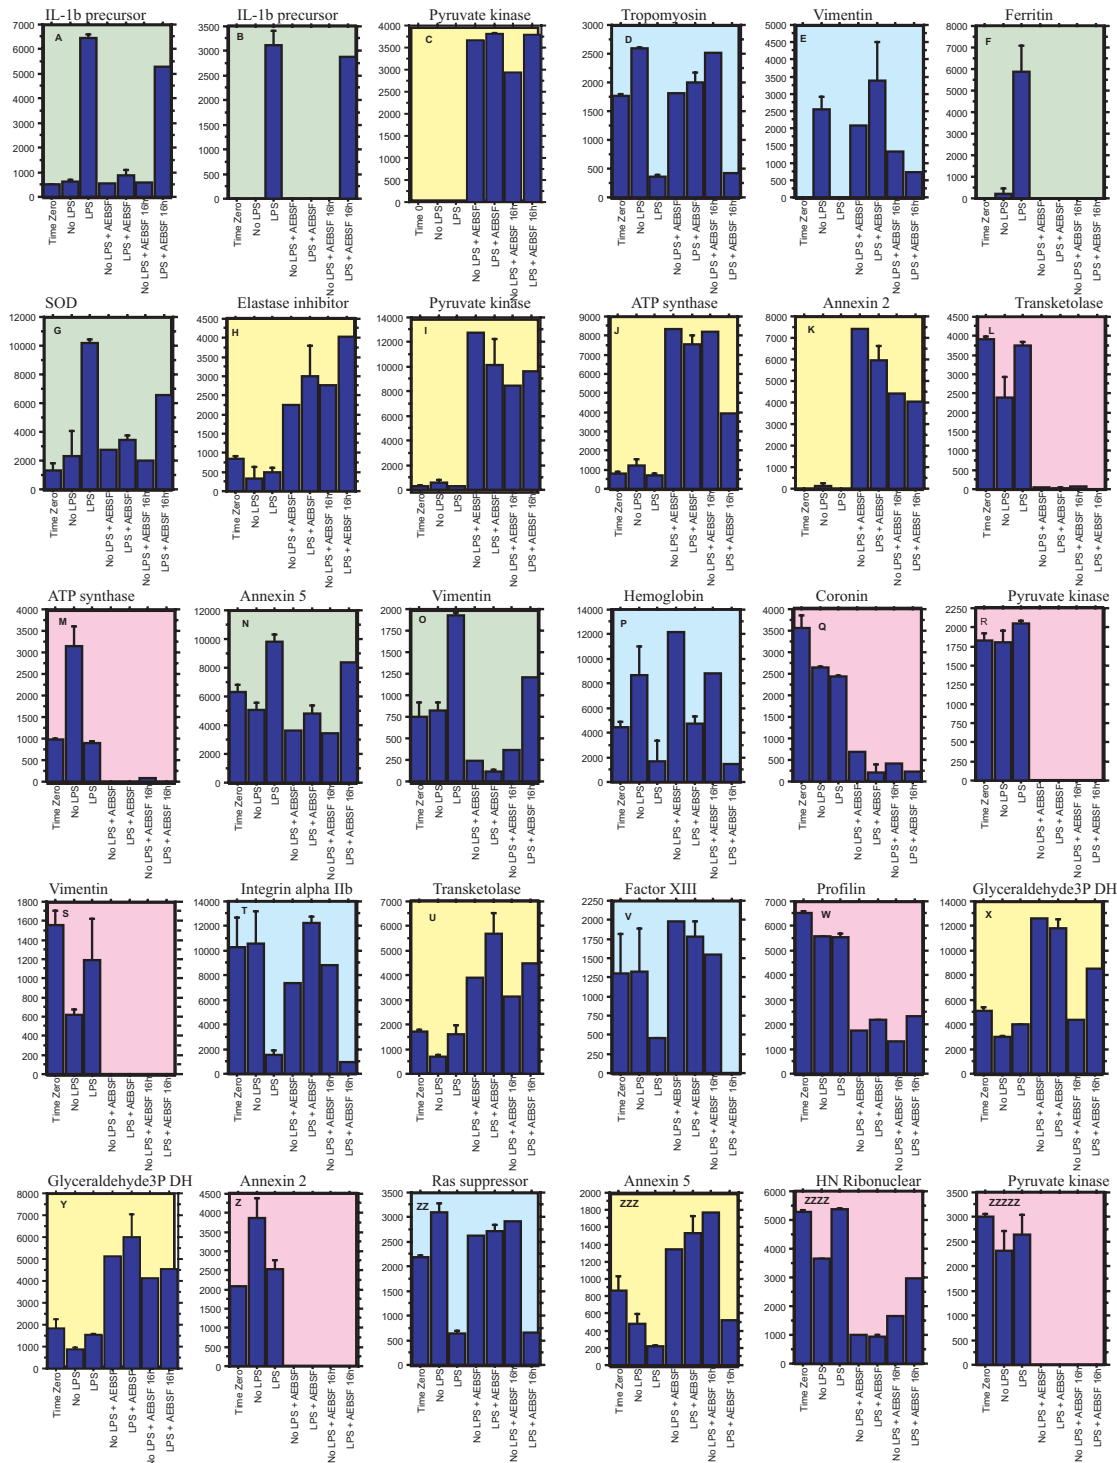

  Up with AEBSF    
   Down with AEBSF    
   Down with LPS    
   Up with LPS
